# Supplementary material
Source: MDPI journal article supplement (https://www.mdpi.com/2227-9717/9/10/1846)
Supplement: s1 [file s1]

# Can alkali and alkali-earth metals promote Ni/Zeolite catalysts performances towards CO<sub>2</sub> methanation?

M. Carmen Bacariza, Cláudia Grilo, Paula Teixeira, José M. Lopes and Carlos Henriques

## Supplementary material

Complementary information regarding purity and suppliers of the chemicals used in the synthesis of the catalysts from this work.

|                     |                                                                                      |
|---------------------|--------------------------------------------------------------------------------------|
| USY precursor       | CBV 780, provided by Zeolyst company                                                 |
| Cesium precursor    | CsNO <sub>3</sub> , Sigma Aldrich, purity: ≥99 %                                     |
| Nickel precursor    | Ni(NO <sub>3</sub> ) <sub>2</sub> ·6H <sub>2</sub> O, Sigma Aldrich, purity: ≥98.5 % |
| Lithium precursor   | LiNO <sub>3</sub> , Sigma Aldrich, purity: ≥99 %                                     |
| Potassium precursor | KNO <sub>3</sub> , Sigma Aldrich, purity: ≥99 %                                      |
| Magnesium precursor | Mg(NO <sub>3</sub> ) <sub>2</sub> ·6H <sub>2</sub> O, Sigma Aldrich, purity: ≥99 %   |
| Calcium precursor   | Ca(NO <sub>3</sub> ) <sub>2</sub> ·4H <sub>2</sub> O, Sigma Aldrich, purity: ≥99 %   |
| 2-Propanol          | Scharlau, analytical grade                                                           |

### Complementary information regarding gases supplier and purity

All gases (for preparation, characterization and catalytic tests) were supplied by Air Liquide and presented purities ≥99.9990 %.

### Complementary information regarding XRD analysis:

NiO (COD 1010381); Li<sub>2</sub>O (COD 1010064); Li<sub>2</sub>SiO<sub>3</sub> (COD 2310662); Li<sub>2</sub>SiO<sub>5</sub> (COD 9007747); KO<sub>2</sub> (COD 1537125); MgO (COD 5000225); CaO (COD 1011095); CaCO<sub>3</sub> (COD 9009668).

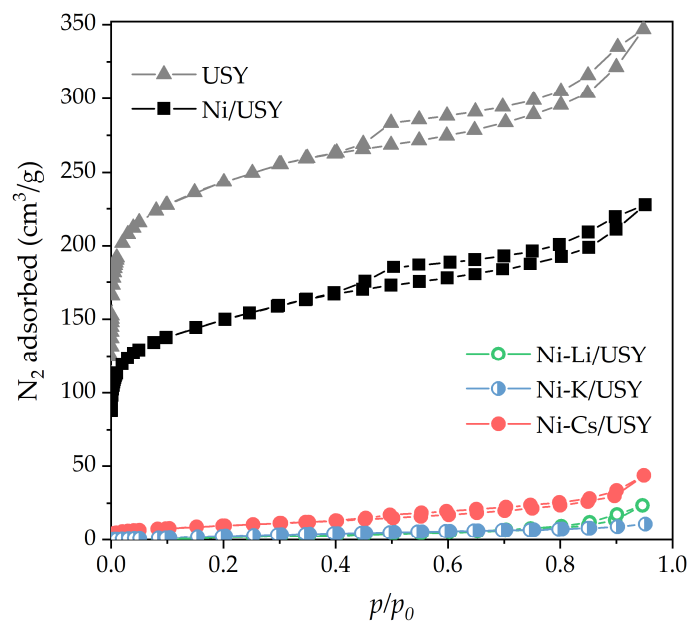

**Figure S1.** N<sub>2</sub> isotherms obtained for the Ni-A/USY catalysts after calcination.

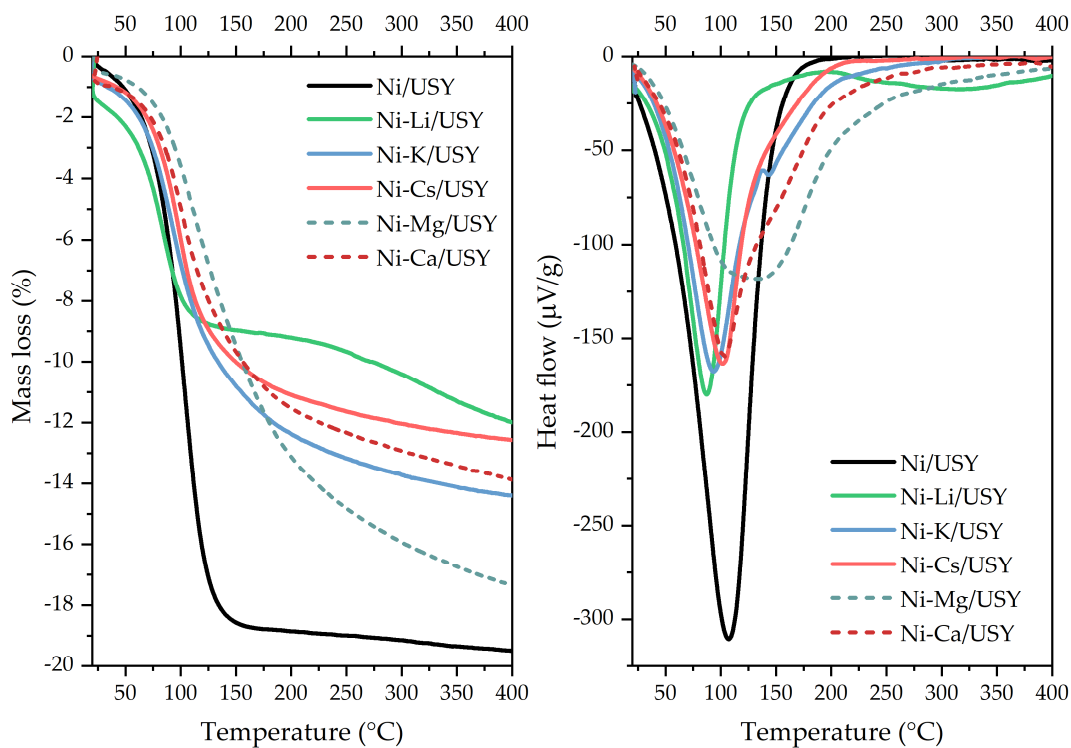

**Figure S2.** TGA results for Ni-A/USY and Ni-AE/USY catalysts after saturation with water.

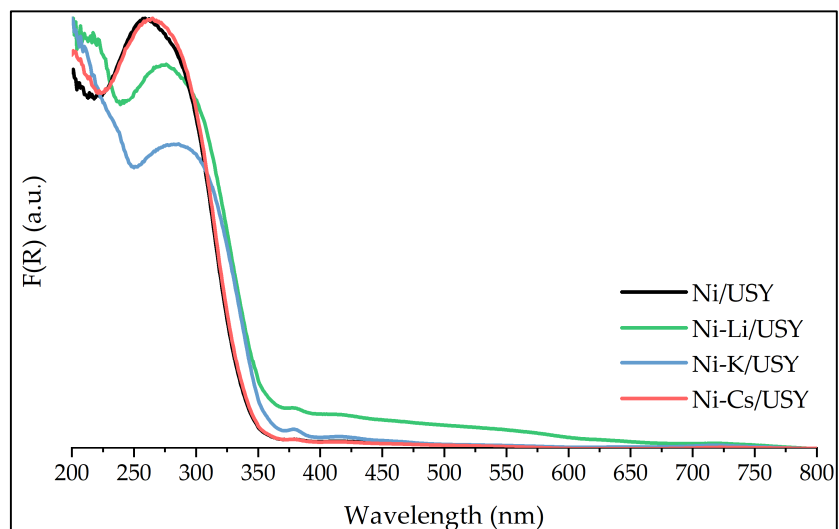

**Figure S3.** DRS UV-Vis spectra obtained for the Ni-A/USY catalysts after calcination.

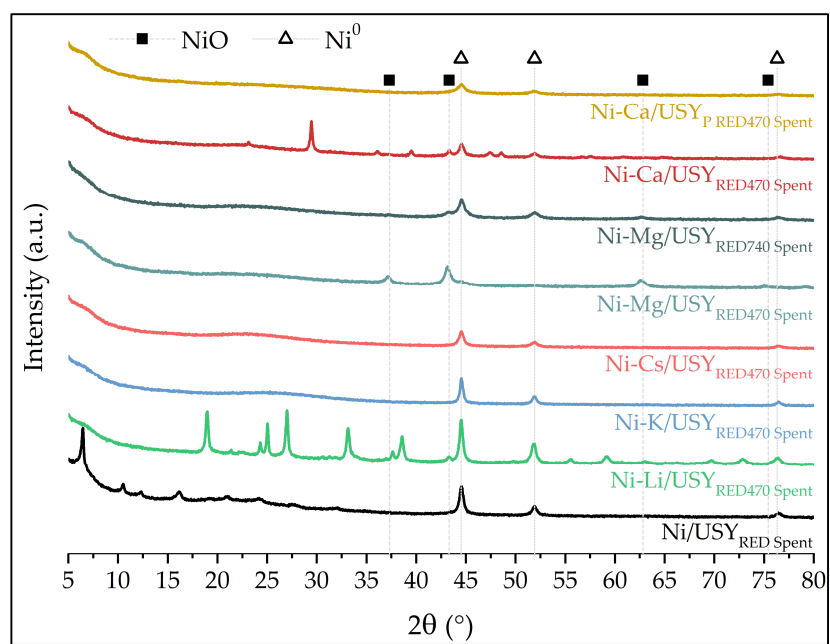

**Figure S4.** XRD patterns collected for all the catalysts from this work after catalytic tests.

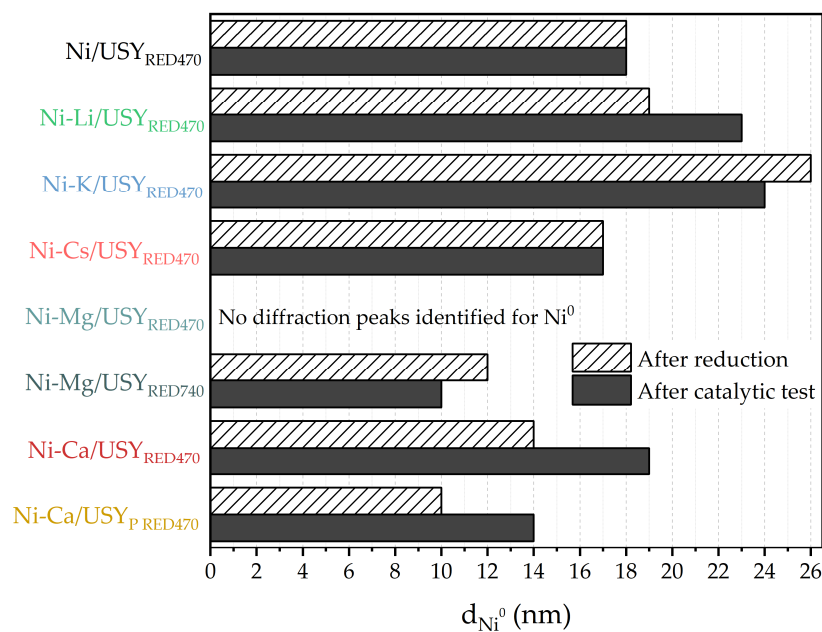

**Figure S5.** Ni<sup>0</sup> crystallite sizes determined from XRD data and using Scherrer equation for all the catalysts from this work after reduction and catalytic tests.

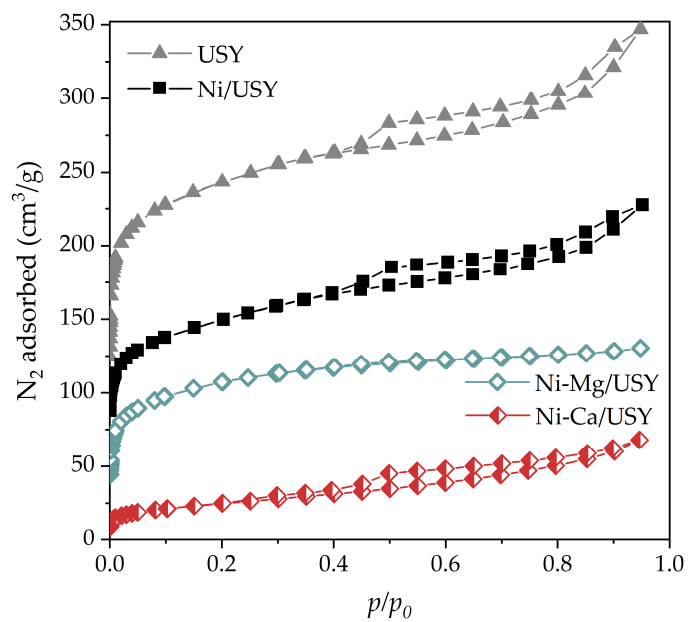

**Figure S6.** N<sub>2</sub> isotherms obtained for the Ni-AE/USY catalysts after calcination.

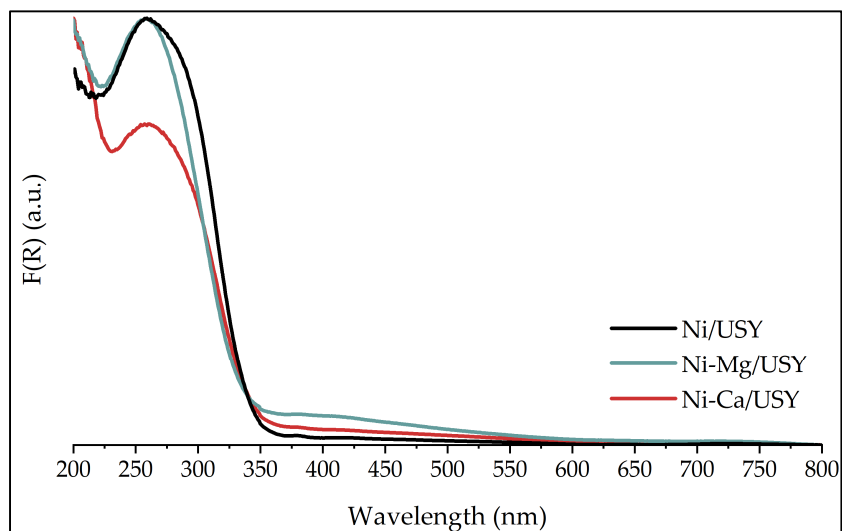

**Figure S7.** DRS UV-Vis spectra obtained for the Ni-AE/USY catalysts after calcination.

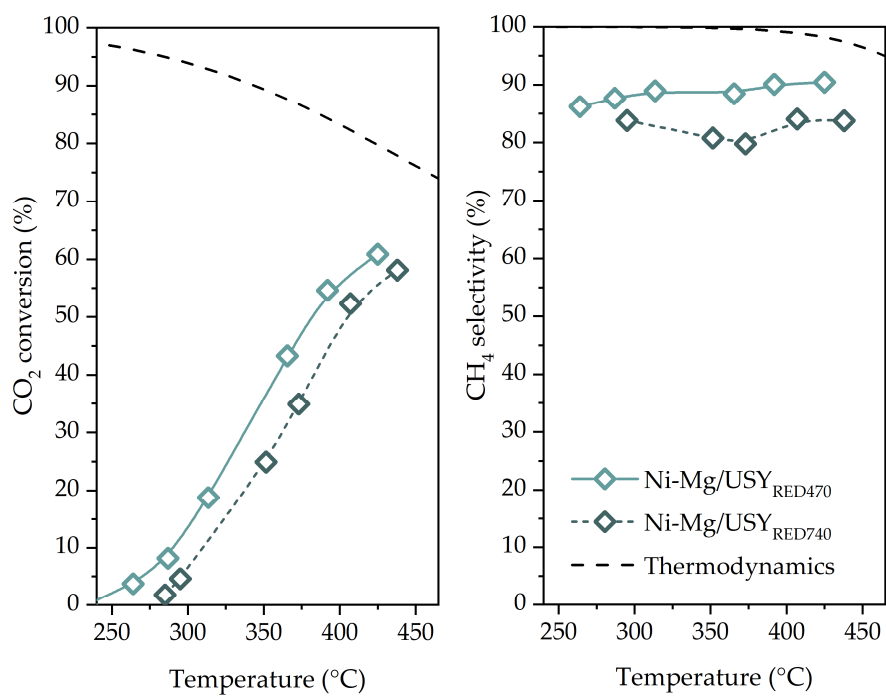

**Figure S8.** Effect of the pre-reduction temperature in the CO<sub>2</sub> conversion and CH<sub>4</sub> selectivity of Ni-Mg/USY catalyst.  
Operating conditions: 1 bar, 86 100 ml h<sup>-1</sup> g<sub>cat</sub><sup>-1</sup>, CO<sub>2</sub>:H<sub>2</sub>:N<sub>2</sub> = 9:36:10.

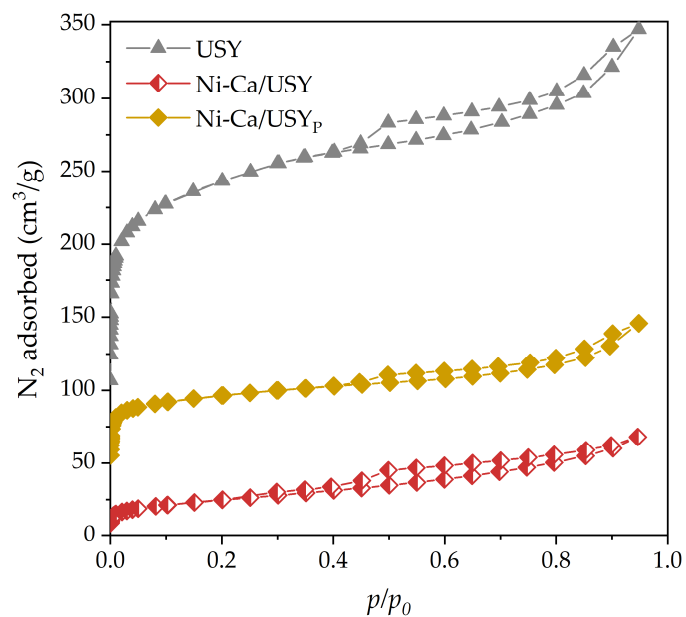

**Figure S9.** N<sub>2</sub> isotherms obtained for the Ni-Ca/USY and Ni-Ca/USY<sub>p</sub> catalysts after calcination.

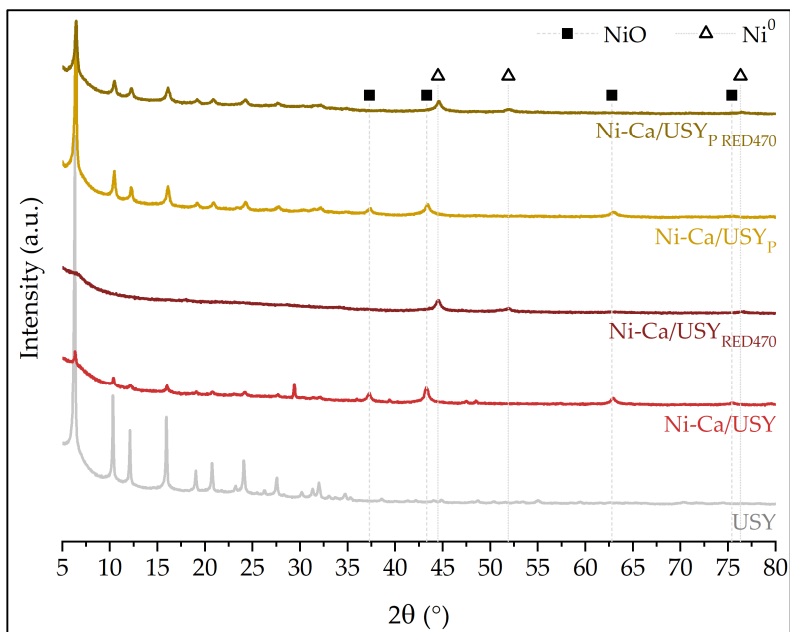

**Figure S10.** XRD patterns obtained for the Ni-Ca/USY and Ni-Ca/USY<sub>p</sub> catalysts after calcination and reduction.
